# Supplementary material for: Simple and efficient expression of Agaricus meleagris pyranose dehydrogenase in Pichia pastoris
Source: PubMed Central journal article supplement — Appl Microbiol Biotechnol. 2011 Nov 13;94(3):695–704. doi: 10.1007/s00253-011-3667-7 (PMC3315643; doi:10.1007/s00253-011-3667-7), 2011-11-13
Supplement: 253_2011_3667_MOESM1_ESM.pdf [file 253_2011_3667_MOESM1_ESM.pdf]

## Supplementary Material

### Simple and efficient expression of *Agaricus meleagris* pyranose dehydrogenase in *Pichia pastoris*

Christoph Sygmund<sup>1</sup>, Alexander Gutmann<sup>2</sup>, Iris Krondorfer<sup>1</sup>, Magdalena Kujawa<sup>1,2</sup>, Anton Glieder<sup>2</sup>, Beate Pscheidt<sup>2</sup>, Dietmar Haltrich<sup>1</sup>, Clemens Peterbauer<sup>1</sup>, Roman Kittl<sup>1§</sup>

<sup>1</sup>*Department of Food Sciences and Technology, BOKU–University of Natural Resources and Applied Life Sciences, Muthgasse 11, 1190 Vienna, Austria*

<sup>2</sup>*ACIB - Austrian Centre of Industrial Biotechnology, Petersgasse 14, 8010 Graz, Austria*

>n-PDH\_syn

atgttgccacgtgttaccagcttaattctagattgcttcttggcattgcttggtatccaaattgcacgtggagctatcacctatcaacaccag  
atgacttgccatctggagtcgactatgactttatcgttccggaggactgctggttggtcgttcttagattgtccgaaaactccaact  
ggaaggtttggtattgaggcaggtccttctaacaaggacgcttctgaccagagttccaggtcttgcactactttgggagcaggatctcca  
attgactggaactacactaccattccacaagatggattggacggaagatccttgattaccctagagctaagattcttggtggtattctacca  
caacggatggtttactagaggtccaaggatgactggaactctgggctggtatcattggtgatcagggtcttgggtggactctatcttac  
cagctatcaagaaggctgaaaagttcactcaggattcactgaccagtctgtaagggtcacatcgaccatctgttcacggtttcgatggaaa  
actttctgtgtccgcagcttattccaacatttcttaacgacctttgttcgagaccactaaagagttgaacgctgagttccattcaagttggaca  
tgaatgacggtaaaccaattggattgggttgactcagtacactattgacaaccacgctgaacgttcttctctgctacctctacttgagctca  
ccggagacaacgttcatgttctgtcaacactttagtactagagttcttccgcttctgtaacggaaccgatttcagaaaggttgagttgccgt  
tgacgccaaattctccaaagaagcaattggaggccaaaaaggaggtgattgtcgtggaggtgtatcgcactccacagattttgatgaactct  
ggtattggtgaacgtaaagttctcaggctgtcggatcgcactttgattgacaacccttctgttgtaagaacttgccgaccaaggagccac  
ctctgttatgttcgacaccactttgcatccaccgacttcgacgtggacgctgccttgaccgagtggaaccaactctcacactggtcctttggcac  
gtggagctagacttaaccacttgacttctgtagattgccagatgacaagcttaacggtaagatccttctctgtaagaactctccacatc  
gagttccagttgccc aaatcactcctcaagttccaactcttgggtgccctaagcaagcaccactcctgcagctaattcttatcgtctttgcttca  
attggctgtcgttaactgtactctatctctagaggtctatctcctgtctgacaacaatccatttacttaccacttattgaccttaacatgttcaag  
gaagacattgatacgtatccttagagaaggaatccgttctgctggaagaatgttcttccaaggccttcaagaactctgtaacaagttcgtc  
taccacctgctgacgctacttctgacgaggatttgacgccttcttgcgttctctacttctcctacgttcacggagttggtaccttgctatgtc  
ccctaagggtgcttcttggggtgtcgtgaaccagacttcaaggttaagggtacctccggttgagagtcgtggacgcttctgttatccctcac  
gtccagctgcccaactcaactcctgtctacgcttctgctgaatacgttccgattgattgctaaatcttacaattaa

**Supplementary figure 1.** Codon optimized sequence of the *pdh1* gene from *Agaricus meleagis* including the native signal sequence.

>alpha-factor\_syn

atgagattcccatctatttcaccgctgtcttggtcgtgcctcctctgcattggctgccctgtaaacactaccactgaaga  
cgagactgctcaaattccagctgaagcagttatcggtfactctgacctgagggtgattcgacgtcgctgtttgccttct  
ctaactccactaacaacggtttggttcattaacaccactatcgctccattgctgctaaggaagagggtgtctctctcgag  
aagagagaggccgaagct

**Supplementary figure 2.** Codon optimized sequence of the  $\alpha$ -factor pre-pro leader peptide from *S. cerevisiae*.
